# Supplementary material for: A call for collaboration among food systems programs in higher education to train the future workforce
Source: Frontiers journal article supplement (doi:10.3389/fsufs.2023.1306525), 2024-01-05
Supplement: Data_Sheet_1.PDF [file Data_Sheet_1.PDF]

## ***Supplementary Material***

### **1. Supplementary Data .....2**

*Methods Supplement for Washington State Case Study*

### **2. Supplementary Figures and Tables .....7**

*Supplementary Table 1: Inventory of food systems programs at U.S. institutions of higher education as of March 2022*

## 1. Supplementary Data

### Methods Supplement for Washington State Case Study

The Washington State case study compared and contrasted the two programs and explored complimentary attributes and opportunities for collaboration in food systems educational programming between UW and WSU. The research team employed a multi-phase mixed methods approach, utilizing student interest surveys, SWOT (strengths, weaknesses, opportunities, and threats) analysis interviews, and an inter-institutional workshop. Both the student interest surveys and SWOT interviews were carried out in tandem at each university, by research team members of each respective institution. Results were shared with a wide range of faculty and administrators from both universities via a culminating inter-institutional workshop, during which participants were invited to network, reflect on survey and SWOT findings, and think critically about potential pathways of future collaboration.

#### *Student Surveys*

The anonymous, 7-question student interest survey was designed by the research team to better understand undergraduate student interest in food systems subject areas, as well as to gauge interest in potential avenues of cross-institutional information exchange and experiential learning. Survey questions are listed at the end of this methods supplement. The surveys deployed at UW and WSU were identical, save for the institution-specific schools and colleges listed as response options. Questions regarding disciplinary interests and joint learning possibilities were created by reflecting on the diversity of food systems subject areas present in courses at both universities and cataloging unique partnerships and experiential learning opportunities at each institution. Surveys were administered via Google Forms distributed to several food systems classes at UW and to one food systems class plus a listserv of AFS course-enrolled students at WSU. A total of 395 responses were received (343 from UW and 52 from WSU). Institution-specific and cross-institutional analyses were conducted, categorizing primary subject and joint-learning interests, and comparing primary student interests and “expansion interests” (subject areas that students expressed interest in engaging with further). Comparisons between UW and WSU students were limited by the imbalance in response numbers.

#### *SWOT Analysis*

For the SWOT analysis, 27 semi-structured interviews were conducted with faculty and staff of both institutions. Sixteen UW and 17 WSU affiliates were contacted, with 13 from UW and 14 from WSU ultimately participating. Interviewees from each institution were made up of core program faculty, staff members, high level leadership, and senior faculty members from partnered colleges, schools, and departments. Participants were recruited via email invitation.

Interviews were conducted in November and December of 2020. Interviews lasted from 20-45 minutes and were conducted by one interviewer. The interview guide was shared with participants in advance of each interview and was based on SWOT analysis frameworks. The interview guide included questions pertaining to each of the four categories of SWOT: strengths, weaknesses,

opportunities, and threats, and is reproduced at the end of this methods supplement. Strengths and opportunities were defined as those things which are helpful to achieving programmatic objectives, while weaknesses and threats were defined as those things which are harmful to achieving programmatic objectives. Further, strengths and weaknesses were defined as those things which have an internal origin (reflecting attributes of the program), whereas opportunities and threats were defined as those things which have an external origin (describing attributes of the environment).

Interviews were recorded using Zoom only when interviewees agreed to be recorded. Detailed notes were taken for all interviews, regardless of recording, by the interview facilitator and with the help of an additional note taker when possible. Interview transcripts and notes were used to code and analyze based on a combination of SWOT category and theme. Initially, themes were identified as they emerged from the data. Two researchers (one from each institution) worked through this iteratively until theme saturation was reached and a codebook was created. The following themes emerged and were used to organize key excerpts from the interviews by SWOT category: faculty, student engagement, experiential learning, breadth of foundation, student advising and learning, curriculum, budget, research, institutional/system, unique elements, and uncertainties (i.e., food systems as a hot topic, COVID-19, climate change). Two researchers from each institution then double coded two full interviews to ensure high interrater reliability of the codebook. High-interrater reliability was confirmed by comparing the independent coding choices of each researcher, which were essentially identical across both of the test interviews. One researcher from each university then coded the remaining interviews. Excerpts were organized in a spreadsheet by category and theme. Spreadsheets were then reviewed twice by two researchers to synthesize and come to agreement on the summarization of each grouping of key excerpts by category/theme and then to identify key quotes that exemplified each theme. Institution-specific reports were prepared for internal use by each program. In addition, cross-institutional findings were synthesized into a concise table and shared with personnel of both programs.

### *Workshop*

Analyses for both the student interest surveys and SWOT were shared in a joint UW/WSU workshop, attended by 34 members of faculty, staff, and leadership from both programs (17 from UW and 17 from WSU). The 4 hour workshop was held in January of 2021 via Zoom. The research team carefully crafted an agenda and detailed slide deck, including background information on program characteristics and future possibilities for inter-institutional collaboration identified through the research process. Attendees provided feedback via both small and large group discussions, and also had opportunities for cross-institutional networking. All proceedings and feedback, including small group discussions facilitated in breakout rooms, were captured in notes taken by the research team and synthesized as part of the project's results and recommendations.

## Student survey questions

| <i>Question</i>                                                                                                                                                                                                                                                                                                                          | <i>Response options</i>                                                                                                                                                                                                                                                                                                                                                                                                                                                                                                                                                                                                                                                                                                                                                                                                                                                                                                                                                                                                                                                     |
|------------------------------------------------------------------------------------------------------------------------------------------------------------------------------------------------------------------------------------------------------------------------------------------------------------------------------------------|-----------------------------------------------------------------------------------------------------------------------------------------------------------------------------------------------------------------------------------------------------------------------------------------------------------------------------------------------------------------------------------------------------------------------------------------------------------------------------------------------------------------------------------------------------------------------------------------------------------------------------------------------------------------------------------------------------------------------------------------------------------------------------------------------------------------------------------------------------------------------------------------------------------------------------------------------------------------------------------------------------------------------------------------------------------------------------|
| <b>Section 1: Your major</b>                                                                                                                                                                                                                                                                                                             |                                                                                                                                                                                                                                                                                                                                                                                                                                                                                                                                                                                                                                                                                                                                                                                                                                                                                                                                                                                                                                                                             |
| Are you in a major? (Select only one)                                                                                                                                                                                                                                                                                                    | <ul style="list-style-type: none"> <li>• Yes</li> <li>• No</li> </ul>                                                                                                                                                                                                                                                                                                                                                                                                                                                                                                                                                                                                                                                                                                                                                                                                                                                                                                                                                                                                       |
| <b>Section 2: School or college of your major</b>                                                                                                                                                                                                                                                                                        |                                                                                                                                                                                                                                                                                                                                                                                                                                                                                                                                                                                                                                                                                                                                                                                                                                                                                                                                                                                                                                                                             |
| Which school or college is your major located in? (Dropdown)                                                                                                                                                                                                                                                                             | Students received an institution-specific list of colleges and schools                                                                                                                                                                                                                                                                                                                                                                                                                                                                                                                                                                                                                                                                                                                                                                                                                                                                                                                                                                                                      |
| <b>Section 3: Food Systems Interests</b><br>For the purposes of this survey, food systems can be understood as referring to all processes, infrastructure, and experiences relating to food and feeding a population. This includes, but is not limited to, all aspects of food production, food distribution, and nutrition and health. |                                                                                                                                                                                                                                                                                                                                                                                                                                                                                                                                                                                                                                                                                                                                                                                                                                                                                                                                                                                                                                                                             |
| Which of the following statements best describes your relationship to food systems education? (Select only one)                                                                                                                                                                                                                          | <ul style="list-style-type: none"> <li>• Food systems is a central component of my major</li> <li>• My degree path includes required food systems coursework</li> <li>• I am pursuing coursework related to food systems, but it is not required for my degree path</li> <li>• I am not pursuing coursework related to food systems</li> <li>• Don't know</li> </ul>                                                                                                                                                                                                                                                                                                                                                                                                                                                                                                                                                                                                                                                                                                        |
| What are your main interests within the topic of food systems? (Mark up to three)                                                                                                                                                                                                                                                        | <ul style="list-style-type: none"> <li>• Agribusiness management</li> <li>• Agricultural economics</li> <li>• Agricultural sciences (e.g. animal science, agronomy, soil science)</li> <li>• Agricultural education (e.g. high school teaching)</li> <li>• Agriculture and the environment, including agricultural sustainability</li> <li>• Agricultural technology and mechanics</li> <li>• Engineering related to food systems (e.g. civil, environmental, chemical)</li> <li>• Fisheries</li> <li>• Food culture, anthropology, and/or history</li> <li>• Food entrepreneurship, business, and marketing/advertising</li> <li>• Food justice and social change</li> <li>• Food law</li> <li>• Food policy</li> <li>• Food science (e.g. safety, toxicology, manufacture, processing, preservation)</li> <li>• Food security</li> <li>• Human-centered design related to food systems</li> <li>• International development and diplomacy related to food systems</li> <li>• Organic and sustainable agriculture</li> <li>• Nutrition, diet, and public health</li> </ul> |

|                                                                                                                                                                                                                                                                                                                                                                                                                            |                                                                                                                                                                                                                                                                                                                                                                                                                                                                                                                                                                                                                                                                                                                                                                                                                                                                                                                                                                 |
|----------------------------------------------------------------------------------------------------------------------------------------------------------------------------------------------------------------------------------------------------------------------------------------------------------------------------------------------------------------------------------------------------------------------------|-----------------------------------------------------------------------------------------------------------------------------------------------------------------------------------------------------------------------------------------------------------------------------------------------------------------------------------------------------------------------------------------------------------------------------------------------------------------------------------------------------------------------------------------------------------------------------------------------------------------------------------------------------------------------------------------------------------------------------------------------------------------------------------------------------------------------------------------------------------------------------------------------------------------------------------------------------------------|
|                                                                                                                                                                                                                                                                                                                                                                                                                            | <ul style="list-style-type: none"> <li>• Supply chain, transportation, and distribution within food systems</li> <li>• Urban planning as it relates to the food system</li> <li>• Technology development (e.g. mobile apps, remote sensing) related to food systems</li> <li>• Other (write-in)</li> </ul>                                                                                                                                                                                                                                                                                                                                                                                                                                                                                                                                                                                                                                                      |
| Are there areas into which you would like to expand your food systems education, if available? (Mark all that apply)                                                                                                                                                                                                                                                                                                       | Same list as previous question                                                                                                                                                                                                                                                                                                                                                                                                                                                                                                                                                                                                                                                                                                                                                                                                                                                                                                                                  |
| <b>Section 4: Opportunities</b><br>The University of Washington (UW) and Washington State University (WSU) are exploring options for offering joint learning options related to food systems that would provide students from each university with opportunities for exposure to subjects and networks typically available only through the other university or to enhance urban and rural understandings and connections. |                                                                                                                                                                                                                                                                                                                                                                                                                                                                                                                                                                                                                                                                                                                                                                                                                                                                                                                                                                 |
| This proposed “information exchange” could take the form of experiential learning, which can be defined here as hands-on learning opportunities designed to immerse students in content and foster the creation of new connections. If UW and WSU are to put this partnership into action, which, if any, of the following experiential learning opportunities would be of interest to you? (Mark all that apply)          | <ul style="list-style-type: none"> <li>• Community-based projects, facilitated by and for the benefit of community organizations working in the realm of food systems, that would provide students with real-world experience in community partnership and various types of food systems work. (e.g. GruB, Tilth Alliance, Nurturing Roots, WSU Extension, Northwest Harvest)</li> <li>• Field experiences (e.g. trips to farms, manufacturing and processing facilities, hands-on classes, professional development opportunities within a food system sector, etc.)</li> <li>• Internships with organizations and professionals working in the realm of food systems (Including UW and WSU faculty and staff as well as external partners e.g. WSDA, USDA, Department of Health, SNAP)</li> <li>• Applied research opportunities (Including UW and WSU faculty and staff as well as external partners e.g. WSDA, USDA, Department of Health, SNAP)</li> </ul> |
| Which, if any, of the following other formats for such “information exchange” opportunities would be of interest to you? (Mark up to three)                                                                                                                                                                                                                                                                                | <ul style="list-style-type: none"> <li>• A certificate type option where a cohort of students from the two universities come together for several intensive food systems workshops and then work together on a weeklong culminating experience (e.g. students would attend 4 weekend workshops over a year and then a weeklong intensive culminating experience resulting in a food systems training certificate).</li> <li>• Farm exchange program: UW Urban Farm and WSU Organic Farm Joint courses co-taught by UW and WSU instructors and focused on multi, inter, and trans-disciplinarity in food systems.</li> </ul>                                                                                                                                                                                                                                                                                                                                     |

|  |                                                                                                                                                                                                                                                                                                                                                                                                                                                                                                                                                                                                                                                                                                                                                                                                                                                                                                        |
|--|--------------------------------------------------------------------------------------------------------------------------------------------------------------------------------------------------------------------------------------------------------------------------------------------------------------------------------------------------------------------------------------------------------------------------------------------------------------------------------------------------------------------------------------------------------------------------------------------------------------------------------------------------------------------------------------------------------------------------------------------------------------------------------------------------------------------------------------------------------------------------------------------------------|
|  | <ul style="list-style-type: none"> <li>• Joint seminar series bringing WSU expertise to UW and vice versa.</li> <li>• Learning communities where students take multiple linked courses together as a cohort in order to learn together over time.</li> <li>• Student-to-student collaborative projects (e.g. capstone projects) that pair up UW and WSU students to work together addressing real-world food systems issues.</li> <li>• Summer week-long intensive experiences designed to provide thorough introduction to topics such as agricultural science, food policy, etc.</li> <li>• Supplemental instruction opportunities such as honors programs or optional labs/discussions/field trips. Supplemental instruction is a regularly scheduled, optional element students may choose to add a larger pre-existing class in which they are registered.</li> <li>• Other (write-in)</li> </ul> |
|--|--------------------------------------------------------------------------------------------------------------------------------------------------------------------------------------------------------------------------------------------------------------------------------------------------------------------------------------------------------------------------------------------------------------------------------------------------------------------------------------------------------------------------------------------------------------------------------------------------------------------------------------------------------------------------------------------------------------------------------------------------------------------------------------------------------------------------------------------------------------------------------------------------------|

### SWOT interview guide

| <i>SWOT category</i> | <i>Prompts</i>                                                                                                                                                                                                                                                                                                                                                                                                              |
|----------------------|-----------------------------------------------------------------------------------------------------------------------------------------------------------------------------------------------------------------------------------------------------------------------------------------------------------------------------------------------------------------------------------------------------------------------------|
| Strengths            | <ul style="list-style-type: none"> <li>• What does our program do well?</li> <li>• What do you see as indicators of success for our program?</li> <li>• What contributes to the success of our program?</li> <li>• Does our program have any unique resources or capabilities?</li> </ul>                                                                                                                                   |
| Weaknesses           | <ul style="list-style-type: none"> <li>• What are weaknesses of our program?</li> <li>• How do you see these weaknesses affecting the program?</li> <li>• What are the reasons for our program weaknesses?</li> <li>• Can these weaknesses be overcome? (i.e., solvable)</li> </ul>                                                                                                                                         |
| Opportunities        | <ul style="list-style-type: none"> <li>• Are there potential opportunities internally at our university that could strengthen our program and our offerings to students?</li> <li>• Are there potential opportunities externally to our university that could strengthen our program and our offerings to students?</li> </ul>                                                                                              |
| Threats              | <ul style="list-style-type: none"> <li>• What internal barriers, threats, or pressures might negatively impact our program and our offerings to students?</li> <li>• What external barriers, threats, or pressures might negatively impact our program and our offerings to students? (Probe: Such as changes to academia/research, industry pressures, changes to food systems, changes with competitors, etc.)</li> </ul> |

## 2. Supplementary Figures and Tables

**Supplementary Table 1.** Inventory of food systems programs at U.S. institutions of higher education as of March 2022.

| State       | Institution                       | Program Name <sup>a</sup>                              | Degree Awarded <sup>a</sup>                | Degree Category          | Home College or School <sup>a</sup>                                                            | Home College or School Category <sup>b</sup> | Land Grant or Public Health Affiliation <sup>c</sup> |
|-------------|-----------------------------------|--------------------------------------------------------|--------------------------------------------|--------------------------|------------------------------------------------------------------------------------------------|----------------------------------------------|------------------------------------------------------|
| Arizona     | University of Arizona             | Nutrition and Food Systems                             | Bachelor of Science                        | Bachelor's               | College of Agriculture, Life & Environmental Sciences                                          | Agriculture                                  | LGU                                                  |
| Arizona     | Prescott College                  | Sustainable Food Systems                               | Bachelor of Arts                           | Bachelor's               | N/A                                                                                            | No School / College                          | Neither                                              |
| Arizona     | Arizona State University          | Sustainable Food Systems                               | Bachelor of Science                        | Bachelor's               | College of Global Futures; School of Sustainability                                            | Other                                        | Neither                                              |
| Arizona     | Prescott College                  | Sustainable Food Systems                               | Bachelor of Science                        | Bachelor's               | N/A                                                                                            | No School / College                          | Neither                                              |
| Arizona     | Arizona State University          | Sustainable Food Systems                               | Undergraduate certificate                  | Undergraduate non-degree | College of Global Futures; School of Sustainability                                            | Other                                        | Neither                                              |
| California  | University of California Davis    | Sustainable Agriculture and Food Systems               | Bachelor of Science                        | Bachelor's               | College of Agriculture and Environmental Sciences                                              | Agriculture                                  | LGU                                                  |
| California  | University of California Berkeley | Food Systems                                           | Minor                                      | Undergraduate non-degree | Rausser College of Natural Resources                                                           | Environmental Sciences                       | Neither                                              |
| California  | University of California Berkeley | Food Systems                                           | Graduate certificate                       | Graduate non-degree      | Rausser College of Natural Resources; Goldman School of Public Policy; School of Public Health | Interdisciplinary / Multiple                 | SPH/PHP                                              |
| Colorado    | Colorado State University         | Agricultural Business: Food Systems Concentration      | Bachelor of Science, concentration         | Bachelor's               | College of Agricultural Sciences                                                               | Agriculture                                  | LGU                                                  |
| Colorado    | Colorado State University         | Nutrition and Food Science: Food Systems Concentration | Bachelor of Science, concentration         | Bachelor's               | College of Health and Human Sciences                                                           | Other Health Sciences                        | Neither                                              |
| Colorado    | University of Colorado Boulder    | Masters of the Environment: Sustainable Food Systems   | Masters of the environment, specialization | Master's                 | College of Arts and Sciences                                                                   | Arts and Sciences                            | Neither                                              |
| Connecticut | University of Connecticut         | Sustainable Community Food Systems                     | Minor                                      | Undergraduate non-degree | College of Liberal Arts & Science; College of Agriculture, Health and Natural Resources        | Interdisciplinary / Multiple                 | LGU                                                  |

|          |                                 |                                                                                        |                                    |                          |                                                              |                        |         |
|----------|---------------------------------|----------------------------------------------------------------------------------------|------------------------------------|--------------------------|--------------------------------------------------------------|------------------------|---------|
| Delaware | University of Delaware          | Sustainable Food Systems                                                               | Bachelor of Science                | Bachelor's               | College of Agriculture and Natural Resources                 | Agriculture            | LGU     |
| Delaware | University of Delaware          | Food Systems Innovation and Entrepreneurship                                           | Undergraduate certificate          | Undergraduate non-degree | College of Agriculture and Natural Resources                 | Agriculture            | LGU     |
| Florida  | University of Florida           | Agroecology and Sustainable Food Systems                                               | Undergraduate certificate          | Undergraduate non-degree | College of Agriculture and Life Sciences                     | Agriculture            | LGU     |
| Georgia  | University of Georgia           | Sustainable Food Systems                                                               | Graduate certificate               | Graduate non-degree      | College of Agricultural & Environmental Sciences             | Agriculture            | LGU     |
| Georgia  | University of Georgia           | Local Food Systems                                                                     | Undergraduate certificate          | Undergraduate non-degree | College of Agricultural and Environmental Sciences           | Agriculture            | LGU     |
| Georgia  | Georgia Southern University     | Nutrition and Food Science: Food Science/Food Systems Administration Emphasis          | Bachelor of Science                | Bachelor's               | Waters College of Health Professions                         | Other Health Sciences  | Neither |
| Hawaii   | University of Hawaii West O'ahu | Bachelor of Applied Science with a Concentration in Sustainable Community Food Systems | Bachelor of Science, concentration | Bachelor's               | Division of Mathematics, Natural, and Health Sciences        | Other                  | Neither |
| Idaho    | University of Idaho             | Sustainable Food Systems                                                               | Bachelor of Science                | Bachelor's               | College of Agricultural and Life Sciences                    | Agriculture            | LGU     |
| Idaho    | University of Idaho             | Sustainable Food Systems                                                               | Minor                              | Undergraduate non-degree | College of Agricultural and Life Sciences                    | Agriculture            | LGU     |
| Illinois | University of Illinois Urbana   | Metropolitan Food and Environmental Systems                                            | Bachelor of Science                | Bachelor's               | College of Agricultural, Consumer and Environmental Sciences | Agriculture            | LGU     |
| Illinois | University of Illinois Urbana   | Food Systems                                                                           | Undergraduate certificate          | Undergraduate non-degree | College of Agricultural, Consumer and Environmental Sciences | Agriculture            | LGU     |
| Illinois | Loyola University Chicago       | Environmental Science: Food Systems and Sustainable Agriculture                        | Bachelor of Science                | Bachelor's               | School of Environmental Sustainability                       | Environmental Sciences | Neither |
| Illinois | DePaul University               | Sustainable Urban Food Systems Graduate Certificate                                    | Graduate certificate               | Graduate non-degree      | College of Liberal Arts and Social Sciences                  | Arts and Sciences      | Neither |
| Illinois | University of Illinois Chicago  | Food Systems                                                                           | Undergraduate certificate          | Undergraduate non-degree | College of Agricultural, Consumer and Environmental Sciences | Agriculture            | Neither |
| Indiana  | Purdue University               | Sustainable Food and Farming Systems                                                   | Bachelor of Science                | Bachelor's               | College of Agriculture                                       | Agriculture            | LGU     |
| Indiana  | Goshen College                  | Sustainable Food Systems                                                               | Bachelor of Arts                   | Bachelor's               | N/A                                                          | No School / College    | Neither |



|               |                                   |                                                                                     |                                              |                          |                                                                                                              |                              |         |
|---------------|-----------------------------------|-------------------------------------------------------------------------------------|----------------------------------------------|--------------------------|--------------------------------------------------------------------------------------------------------------|------------------------------|---------|
| Indiana       | Indiana University at Bloomington | Environmental and Sustainability Studies: Sustainable Food Systems                  | Bachelor of Arts, concentration              | Bachelor's               | College of Arts and Sciences; IU School of Public Health, O'Neill School of Public and Environmental Affairs | Arts and Sciences            | Neither |
| Kansas        | Kansas State University           | Urban Food Systems                                                                  | Graduate certificate                         | Graduate non-degree      | College of Agriculture                                                                                       | Agriculture                  | LGU     |
| Kansas        | Kansas State University           | Horticulture with and emphasis in Urban Food Systems                                | Master of Science                            | Master's                 | College of Agriculture                                                                                       | Agriculture                  | LGU     |
| Kansas        | Kansas State University           | Global Food Systems Leadership                                                      | Bachelor of Arts or Science, secondary major | Bachelor's               | College of Agriculture; Stanley School of Leadership                                                         | Interdisciplinary / Multiple | LGU     |
| Kentucky      | University of Kentucky            | Sustainable Agriculture and Community Food Systems                                  | Bachelor of Science                          | Bachelor's               | College of Agriculture, Food & Environment                                                                   | Agriculture                  | LGU     |
| Kentucky      | Kentucky State University         | Agriculture, Food, and Environment: Option in Nutritional Sciences and Food Systems | Bachelor of Science, concentration           | Bachelor's               | College of Agriculture, Community and the Sciences; School of Agriculture, Communities and the Environment   | Agriculture                  | LGU     |
| Kentucky      | University of Kentucky            | Nutrition and Food Systems                                                          | Master of Science                            | Master's                 | College of Agriculture, Food & Environment                                                                   | Agriculture                  | LGU     |
| Kentucky      | University of Kentucky            | Food Systems and Hunger Studies                                                     | Undergraduate certificate                    | Undergraduate non-degree | College of Agriculture, Food and Environment                                                                 | Agriculture                  | LGU     |
| Louisiana     | Louisiana State University        | Food and Bioprocessing Systems                                                      | Master of Science/Doctorate, concentration   | Master's/Doctorate       | College of Agriculture; School of Nutrition and Food Science                                                 | Agriculture                  | LGU     |
| Maine         | University of Maine               | Sustainable Food Systems                                                            | Minor                                        | Undergraduate non-degree | College of Natural Sciences, Forestry, and Agriculture; School of Food and Agriculture                       | Agriculture                  | LGU     |
| Maine         | College of the Atlantic           | Human Ecology: Farming and Food Systems                                             | Bachelor of Science, concentration           | Bachelor's               | N/A                                                                                                          | No School / College          | Neither |
| Maryland      | Johns Hopkins University          | Food Systems, the Environment, and Public Health                                    | Graduate certificate                         | Graduate non-degree      | Johns Hopkins Bloomberg School of Public Health                                                              | Public Health                | SPH/PHP |
| Maryland      | Johns Hopkins University          | Food Systems Concentration                                                          | Master of Public Health                      | Master's                 | Johns Hopkins Bloomberg School of Public Health                                                              | Public Health                | SPH/PHP |
| Massachusetts | Tufts University                  | Environmental Studies: Food Systems, Nutrition, and the Environment                 | Bachelor of Arts or Science, concentration   | Bachelor's               | School of Arts and Sciences                                                                                  | Arts and Sciences            | Neither |

|               |                                     |                                                                                             |                                                     |                          |                                                                              |                              |         |
|---------------|-------------------------------------|---------------------------------------------------------------------------------------------|-----------------------------------------------------|--------------------------|------------------------------------------------------------------------------|------------------------------|---------|
| Massachusetts | Tufts University                    | Food Systems and Nutrition                                                                  | Minor                                               | Undergraduate non-degree | School of Arts and Sciences                                                  | Arts and Sciences            | Neither |
| Massachusetts | University of Massachusetts Amherst | Sustainability Science: Concentration in Sustainable Agriculture and Food Systems           | Master of Science, concentration                    | Master's                 | College of Natural Sciences                                                  | Environmental Sciences       | Neither |
| Michigan      | Michigan State University           | Sustainable Agriculture and Food Systems                                                    | Master of Arts or Science/Doctorate, specialization | Master's/Doctorate       | College of Agriculture and Natural Resources                                 | Agriculture                  | LGU     |
| Michigan      | Michigan State University           | Sustainable Agriculture and Food Systems                                                    | Minor                                               | Undergraduate non-degree | College of Agriculture and Natural Resources                                 | Agriculture                  | LGU     |
| Michigan      | University of Michigan              | Master of Public Health Degree in Nutritional Sciences: Sustainable Food Systems Focus Area | Master of Public Health, focus area                 | Master's                 | School of Public Health                                                      | Public Health                | SPH/PHP |
| Michigan      | Kalamazoo Valley Community College  | Culinary Arts and Sustainable Food Systems                                                  | Associate of Applied Science                        | Associate's              | N/A                                                                          | No School / College          | Neither |
| Michigan      | University of Michigan              | Sustainable Food Systems                                                                    | Graduate Certificate                                | Graduate non-degree      | School for Environment and Sustainability                                    | Environmental Sciences       | Neither |
| Michigan      | University of Michigan              | Food Systems                                                                                | Master of Science, theme                            | Master's                 | School for Environment and Sustainability                                    | Environmental Sciences       | Neither |
| Michigan      | Kalamazoo Valley Community College  | Culinary Arts and Sustainable Food Systems                                                  | Undergraduate certificate                           | Undergraduate non-degree | N/A                                                                          | No School / College          | Neither |
| Michigan      | Grand Valley State University       | Sustainable Food Systems                                                                    | Undergraduate certificate                           | Undergraduate non-degree | Brooks College of Interdisciplinary Studies                                  | Other                        | Neither |
| Minnesota     | University of Minnesota             | Sustainable Agriculture and Food Systems                                                    | Bachelor of Science                                 | Bachelor's               | College of Food, Agricultural and Natural Resource Sciences                  | Agriculture                  | LGU     |
| Mississippi   | University of Southern Mississippi  | Nutrition and Food Systems                                                                  | Master of Science                                   | Master's                 | College of Education and Human Sciences; School of Kinesiology and Nutrition | Education                    | Neither |
| Montana       | Montana State University            | Sustainable Food and Bioenergy Systems: Sustainable Food Systems Option                     | Bachelor of Science                                 | Bachelor's               | College of Agriculture; College of Education, Health and Human Development   | Interdisciplinary / Multiple | LGU     |
| Montana       | Flathead Valley                     | Agriculture and Food Systems                                                                | Associate of Applied Science                        | Associate's              | N/A                                                                          | No School / College          | Neither |

|                |                                 |                                                        |                                                      |                          |                                                         |                              |         |
|----------------|---------------------------------|--------------------------------------------------------|------------------------------------------------------|--------------------------|---------------------------------------------------------|------------------------------|---------|
|                | Community College               |                                                        |                                                      |                          |                                                         |                              |         |
| Montana        | Montana State University        | Sustainable Food Systems                               | Master of Science, option                            | Master's                 | College of Education, Health and Human Development      | Education                    | Neither |
| Montana        | University of Montana           | Sustainable Agriculture and Food Systems               | Undergraduate certificate                            | Undergraduate non-degree | College of Humanities and Sciences                      | Arts and Sciences            | Neither |
| New England    | University of New England       | Ocean Food Systems                                     | Professional Science Master's                        | Master's                 | College of Arts and Sciences; School of Marine Programs | Arts and Sciences            | Neither |
| New Hampshire  | University of New Hampshire     | Sustainable Agriculture and Food Systems               | Bachelor of Arts                                     | Bachelor's               | College of Life Sciences and Agriculture                | Agriculture                  | LGU     |
| New Hampshire  | University of New Hampshire     | Sustainable Agriculture and Food Systems               | Bachelor of Science                                  | Bachelor's               | College of Life Sciences and Agriculture                | Agriculture                  | LGU     |
| New Hampshire  | University of New Hampshire     | Sustainable Agriculture and Food Systems               | Minor                                                | Undergraduate non-degree | College of Life Sciences and Agriculture                | Agriculture                  | LGU     |
| New Jersey     | Rutgers University              | Agriculture and Food Systems                           | Bachelor of Science                                  | Bachelor's               | School of Environmental and Biological Sciences         | Environmental Sciences       | Neither |
| New Jersey     | Montclair State University      | Nutrition and Food Science: Food Systems Concentration | Bachelor of Science/Master of Science, concentration | Bachelor's/Master's      | College of Education and Human Services                 | Education                    | Neither |
| New Jersey     | Rutgers University              | Agriculture and Food Systems                           | Minor                                                | Undergraduate non-degree | School of Environmental and Biological Sciences         | Environmental Sciences       | Neither |
| New York       | Cornell University              | Food Systems and Health                                | Master of Public Health, concentration               | Master's                 | College of Veterinary Medicine                          | Interdisciplinary / Multiple | Both    |
| New York       | Cornell University              | Community Food Systems                                 | Minor                                                | Undergraduate non-degree | College of Agriculture and Life Sciences                | Agriculture                  | LGU     |
| New York       | Tompkins Cortland               | Sustainable Farming and Food Systems                   | Associate of Applied Science                         | Associate's              | N/A                                                     | No School / College          | Neither |
| New York       | Suny Cobleskill                 | Food Systems and Technology                            | Bachelor of Technology                               | Bachelor's               | School of Agriculture and Natural Resources             | Agriculture                  | Neither |
| North Carolina | North Carolina State University | Agroecology & Sustainable Food Systems                 | Bachelor of Science                                  | Bachelor's               | College of Agriculture and Life Sciences                | Agriculture                  | LGU     |
| North Carolina | Guilford College                | Sustainable Food Systems                               | Bachelor of Arts                                     | Bachelor's               | N/A                                                     | No School / College          | Neither |
| North Carolina | Guilford College                | Sustainable Food Systems                               | Minor                                                | Undergraduate non-degree | N/A                                                     | No School / College          | Neither |
| North Carolina | University of North             | Food, Food Systems and Culture                         | Undergraduate certificate                            | Undergraduate non-degree | N/A                                                     | Interdisciplinary / Multiple | Neither |

|              |                                      |                                                     |                                             |                          |                                                                                                  |                        |         |
|--------------|--------------------------------------|-----------------------------------------------------|---------------------------------------------|--------------------------|--------------------------------------------------------------------------------------------------|------------------------|---------|
|              | Carolina Asheville                   |                                                     |                                             |                          |                                                                                                  |                        |         |
| North Dakota | United Tribes Technical College      | Sustainable Agriculture and Food Systems            | Associate of Applied Science                | Associate's              | N/A                                                                                              | No School / College    | Neither |
| Ohio         | Miami University                     | Food Systems and Food Studies                       | Bachelor of Arts, co-major                  | Bachelor's               | College of Arts & Science                                                                        | Arts and Sciences      | Neither |
| Online       | Harvard University                   | Sustainable Food Systems                            | Graduate Certificate                        | Graduate non-degree      | Faculty of Arts and Sciences; Harvard Extension School                                           | Arts and Sciences      | Neither |
| Online       | Tufts University                     | Sustainable Agriculture and Food Systems            | Graduate Certificate                        | Graduate non-degree      | Gerald J. and Dorothy R. Friedman School of Nutrition Science and Policy                         | Other                  | Neither |
| Online       | Prescott College                     | Sustainable Food Systems                            | Master of Business Administration           | Master's                 | N/A                                                                                              | No School / College    | Neither |
| Online       | Prescott College                     | Sustainable Food Systems                            | Master of Science                           | Master's                 | N/A                                                                                              | No School / College    | Neither |
| Online       | Arizona State University             | Sustainable Food Systems                            | Master of Science                           | Master's                 | College of Global Futures; School of Sustainability                                              | Other                  | Neither |
| Online       | University of Illinois               | Food Systems                                        | Undergraduate certificate                   | Undergraduate non-degree | College of Agricultural, Consumer and Environmental Sciences                                     | Agriculture            | Neither |
| Oregon       | Portland State University            | Sustainable Food Systems                            | Graduate certificate                        | Graduate non-degree      | College of Urban and Public Affairs; Mark O. Hatfield School of Government                       | Other                  | Neither |
| Oregon       | Oregon Health and Science University | Food Systems and Society                            | Master of Science                           | Master's                 | School of Medicine                                                                               | Other Health Sciences  | Neither |
| Oregon       | Oregon State University              | Nutrition in Foodservice, Culinary and Food Systems | Bachelor of Science, option                 | Bachelor's               | College of Public Health and Human Sciences; School of Biological and Population Health Sciences | Public Health          | SPH/PHP |
| Pennsylvania | Pennsylvania State University        | Food Systems                                        | Minor                                       | Undergraduate non-degree | College of Agricultural Sciences                                                                 | Agriculture            | LGU     |
| Pennsylvania | Temple University                    | Sustainable Food Systems                            | Minor                                       | Undergraduate non-degree | Tyler School of Art & Architecture                                                               | Other                  | Neither |
| Pennsylvania | Temple University                    | Sustainable Food Systems                            | Undergraduate certificate                   | Undergraduate non-degree | Tyler School of Art & Architecture                                                               | Other                  | Neither |
| Rhode Island | University of Rhode Island           | Sustainable Agriculture and Food Systems            | Bachelor of Science                         | Bachelor's               | College of the Environment and Life Sciences                                                     | Environmental Sciences | Neither |
| Rhode Island | University of Rhode Island           | Sustainable Agriculture and Food Systems            | Master of Science/Doctorate, specialization | Master's/Doctorate       | College of the Environment and Life Sciences                                                     | Environmental Sciences | Neither |

|                |                                       |                                          |                                    |                          |                                                                         |                       |         |
|----------------|---------------------------------------|------------------------------------------|------------------------------------|--------------------------|-------------------------------------------------------------------------|-----------------------|---------|
| South Carolina | University of South Carolina          | Nutrition and Food Systems               | Minor                              | Undergraduate non-degree | Arnold School of Public Health                                          | Public Health         | SPH/PHP |
| Tennessee      | Lipscomb University                   | Food Systems Management                  | Bachelor of Science                | Bachelor's               | College of Pharmacy and Health Sciences; Division of Health Sciences    | Other Health Sciences | Neither |
| Texas          | Texas A&M University                  | Food Systems Industry Management         | Bachelor of Science                | Bachelor's               | College of Agriculture & Life Sciences                                  | Agriculture           | LGU     |
| Texas          | Texas A&M University                  | Sustainable Agriculture and Food Systems | Bachelor of Science                | Bachelor's               | College of Agricultural Sciences and Natural Resources                  | Agriculture           | LGU     |
| Texas          | Texas A&M University Commerce         | Regulatory Science in Food Systems       | Graduate certificate               | Graduate non-degree      | College of Agriculture and Life Sciences                                | Agriculture           | LGU     |
| Texas          | Texas A&M University Commerce         | Sustainable Food Systems                 | Graduate certificate               | Graduate non-degree      | College of Agricultural Sciences and Natural Resources                  | Agriculture           | LGU     |
| Texas          | Texas Woman's University              | Food Systems Administration              | Master of Science                  | Master's                 | College of Health Sciences                                              | Other Health Sciences | Neither |
| Vermont        | University of Vermont                 | Food Systems                             | Bachelor of Science                | Bachelor's               | College of Agriculture and Life Sciences                                | Agriculture           | LGU     |
| Vermont        | University of Vermont                 | Food Systems                             | Minor                              | Undergraduate non-degree | College of Agriculture and Life Sciences                                | Agriculture           | LGU     |
| Vermont        | University of Vermont                 | Food Systems                             | Master of Science/Doctorate        | Master's/Doctorate       | College of Agriculture and Life Sciences                                | Agriculture           | LGU     |
| Vermont        | Sterling College                      | Sustainable Agriculture and Food Systems | Bachelor of Arts                   | Bachelor's               | N/A                                                                     | No School / College   | Neither |
| Virginia       | Virginia Tech                         | Food and Health Systems Economics        | Bachelor of Science                | Bachelor's               | College of Agriculture and Life Sciences                                | Agriculture           | LGU     |
| Virginia       | Virginia Tech                         | Civic Agriculture and Food Systems       | Minor                              | Undergraduate non-degree | College of Agriculture and Life Sciences                                | Agriculture           | LGU     |
| Washington     | Washington State University           | Agriculture and Food Systems             | Bachelor of Science                | Bachelor's               | College of Agriculture, Human, and Natural Resource Sciences            | Agriculture           | LGU     |
| Washington     | Evergreen College                     | Food Systems                             | Bachelor of Arts, area of emphasis | Bachelor's               | N/A                                                                     | No School / College   | Neither |
| Washington     | University of Washington              | Food Systems, Nutrition, and Health      | Bachelor of Arts                   | Bachelor's               | School of Public Health                                                 | Public Health         | SPH/PHP |
| Wisconsin      | University of Wisconsin               | Food Systems                             | Undergraduate certificate          | Undergraduate non-degree | College of Agricultural and Life Sciences                               | Agriculture           | LGU     |
| Wisconsin      | University of Wisconsin Stevens Point | Sustainable and Resilient Food Systems   | Master of Science                  | Master's                 | College of Professional Studies; School of Health Sciences and Wellness | Other                 | Neither |

- <sup>a</sup> Program name, degree type, and college/school affiliation reflect the information that was publicly available at the time of the inventory (March 2022).
- <sup>b</sup> Agriculture: all colleges and schools with “agriculture” in their name; also includes veterinary medicine; may include natural resource, environmental, life, or natural sciences. Environmental Sciences: colleges and schools with “environment,” “natural resource,” or “natural sciences”—but not “agriculture”—in their name. Arts and Sciences: includes liberal arts, humanities, and social sciences. Public Health: includes accredited schools of public health as well as accredited public health programs in various schools. Other Health Sciences: includes medicine, pharmacy, and human sciences. Education: may also include health and human sciences. Other: single disciplinary school or college not clearly fitting with one of the preceding categories. Interdisciplinary / Multiple: programs administered centrally or between multiple schools/colleges. No School / College: programs at community and technical colleges.
- <sup>c</sup> LGU: housed within a college of agriculture or veterinary medicine at a land grant university. SPH/PHP: housed within an accredited school of public health or public health program.
